# Supplementary material
Source: Springer Nature journal article supplement (https://repositorio.tec.mx/bitstream/handle/11285/613679/12864_2006_958_MOESM6_ESM.pdf)

**A**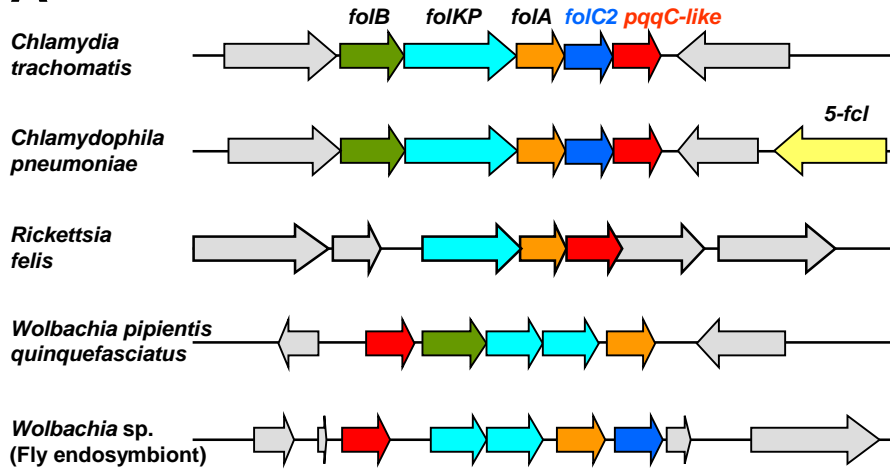**B**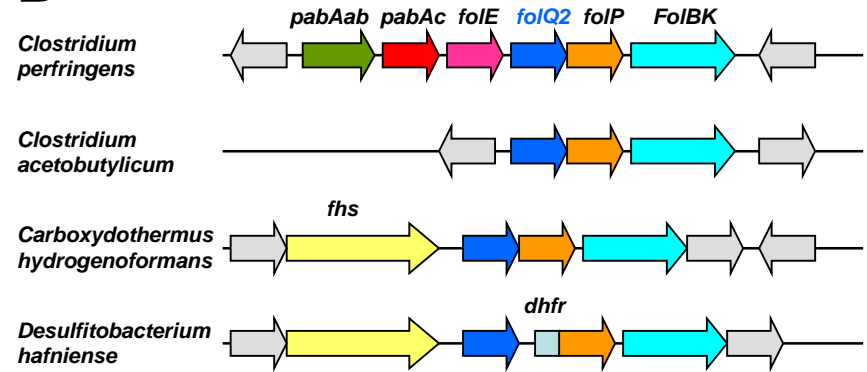**C**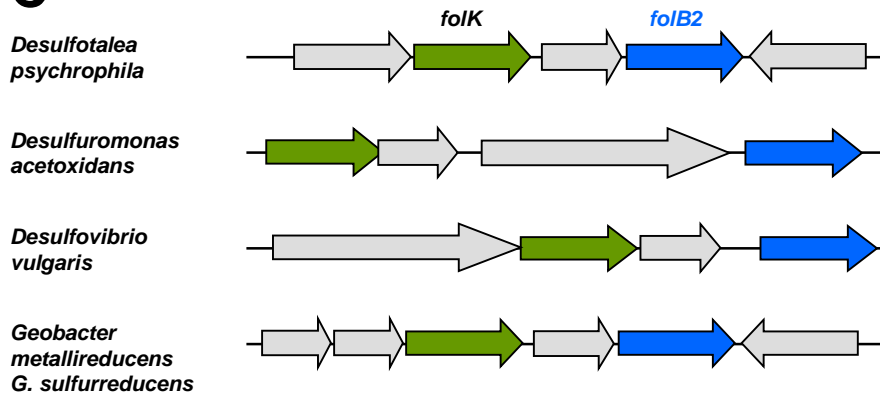**D**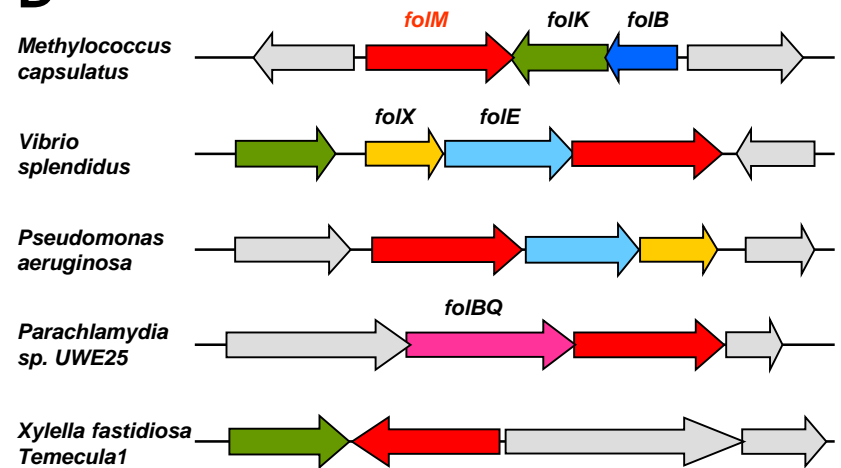

Supplement: MOESM6 [file 12864_2006_958_MOESM6_ESM.pdf]
